# Supplementary material for: Stress hormone-mediated antipredator morphology improves escape performance in amphibian tadpoles
Source: PubMed Central journal article supplement (PMC7904905; doi:10.1038/s41598-021-84052-9), 2021-02-24
Supplement: 41598_2021_84052_MOESM1_ESM.pdf [file 41598_2021_84052_MOESM1_ESM.pdf]

# **Stress hormone-mediated antipredator morphology improves escape performance in amphibian tadpoles**

Michael E. Fraker, Stuart A. Ludsin, Barney Luttbeg, and Robert J. Denver

## **Supplementary Information**

**Supplementary Table S1.** Pairwise contrasts among treatments within each day for tail muscle depth. Rows with an uncorrected  $P$  value  $< 0.05$  are marked in bold. The rightside column indicates significance under the Bonferroni-corrected alpha (S: significant, NS: non-significant).

**Supplementary Table S2.** Pairwise contrasts among treatments within each day for swimming activity. Rows with an uncorrected  $P$  value  $< 0.05$  are marked in bold. The rightside column indicates significance under the Bonferroni-corrected alpha (S: significant, NS: non-significant).

**Supplementary Figure S1.** Boxplots (median and interquartile range) of mass-adjusted tail depth of wood frog tadpoles in each treatment combination ( $n = 4$  replicates) on Day 0 (a), Day 4 (b), and Day 8 (c). Asterisks indicate statistically significant differences compared to the No predator/No hormone treatment (Bonferroni-corrected  $P < 0.05$ ).

Supplementary Table S1. Pairwise contrasts for tail muscle height among treatments during each day of observation.

Rows with an uncorrected P value &lt; 0.05 are marked in bold. The rightside column indicates significance under the Bonferroni-corrected alpha (S: significant, NS: non-significant).

| Day 0                               |                |               |           |             |               |                             |
|-------------------------------------|----------------|---------------|-----------|-------------|---------------|-----------------------------|
| Contrast                            | Estimate       | SE            | df        | t ratio     | P             | (Bonferroni alpha = 0.0014) |
| Con pred/CORT - Con pred/MTP        | 0.00894        | 0.0188        | 78        | 0.474       | 0.9999        | NS                          |
| Con pred/CORT - Con pred/No horm    | 0.01711        | 0.0188        | 78        | 0.908       | 0.9919        | NS                          |
| Con pred/CORT - Int pred/CORT       | -0.02529       | 0.0188        | 78        | -1.342      | 0.9152        | NS                          |
| Con pred/CORT - Int pred/MTP        | -0.01196       | 0.0188        | 78        | -0.634      | 0.9993        | NS                          |
| Con pred/CORT - Int pred/No horm    | -0.02181       | 0.0188        | 78        | -1.157      | 0.9628        | NS                          |
| Con pred/CORT - No pred/CORT        | 0.01857        | 0.0188        | 78        | 0.986       | 0.9862        | NS                          |
| Con pred/CORT - No pred/MTP         | 0.03615        | 0.0188        | 78        | 1.918       | 0.6034        | NS                          |
| Con pred/CORT - No pred/No horm     | 0.03049        | 0.0188        | 78        | 1.618       | 0.7923        | NS                          |
| Con pred/MTP - Con pred/No horm     | 0.00818        | 0.0188        | 78        | 0.434       | 1             | NS                          |
| Con pred/MTP - Int pred/CORT        | -0.03423       | 0.0188        | 78        | -1.816      | 0.6715        | NS                          |
| Con pred/MTP - Int pred/MTP         | -0.02089       | 0.0188        | 78        | -1.109      | 0.9713        | NS                          |
| Con pred/MTP - Int pred/No horm     | -0.03075       | 0.0188        | 78        | -1.632      | 0.7845        | NS                          |
| Con pred/MTP - No pred/CORT         | 0.00964        | 0.0188        | 78        | 0.511       | 0.9999        | NS                          |
| Con pred/MTP - No pred/MTP          | 0.02722        | 0.0188        | 78        | 1.444       | 0.8768        | NS                          |
| Con pred/MTP - No pred/No horm      | 0.02155        | 0.0188        | 78        | 1.143       | 0.9654        | NS                          |
| Con pred/No horm - Int pred/CORT    | -0.0424        | 0.0188        | 78        | -2.25       | 0.385         | NS                          |
| Con pred/No horm - Int pred/MTP     | -0.02907       | 0.0188        | 78        | -1.542      | 0.8318        | NS                          |
| Con pred/No horm - Int pred/No horm | -0.03893       | 0.0188        | 78        | -2.065      | 0.504         | NS                          |
| Con pred/No horm - No pred/CORT     | 0.00146        | 0.0188        | 78        | 0.078       | 1             | NS                          |
| Con pred/No horm - No pred/MTP      | 0.01904        | 0.0188        | 78        | 1.01        | 0.9838        | NS                          |
| Con pred/No horm - No pred/No horm  | 0.01337        | 0.0188        | 78        | 0.71        | 0.9985        | NS                          |
| Int pred/CORT - Int pred/MTP        | 0.01333        | 0.0188        | 78        | 0.708       | 0.9986        | NS                          |
| Int pred/CORT - Int pred/No horm    | 0.00348        | 0.0188        | 78        | 0.185       | 1             | NS                          |
| Int pred/CORT - No pred/CORT        | 0.04387        | 0.0188        | 78        | 2.328       | 0.3389        | NS                          |
| <b>Int pred/CORT - No pred/MTP</b>  | <b>0.06145</b> | <b>0.0188</b> | <b>78</b> | <b>3.26</b> | <b>0.0414</b> | <b>NS</b>                   |
| Int pred/CORT - No pred/No horm     | 0.05578        | 0.0188        | 78        | 2.96        | 0.0905        | NS                          |
| Int pred/MTP - Int pred/No horm     | -0.00986       | 0.0188        | 78        | -0.523      | 0.9998        | NS                          |
| Int pred/MTP - No pred/CORT         | 0.03053        | 0.0188        | 78        | 1.62        | 0.791         | NS                          |
| Int pred/MTP - No pred/MTP          | 0.04811        | 0.0188        | 78        | 2.553       | 0.2239        | NS                          |
| Int pred/MTP - No pred/No horm      | 0.04244        | 0.0188        | 78        | 2.252       | 0.3837        | NS                          |
| Int pred/No horm - No pred/CORT     | 0.04039        | 0.0188        | 78        | 2.143       | 0.4526        | NS                          |
| Int pred/No horm - No pred/MTP      | 0.05797        | 0.0188        | 78        | 3.076       | 0.0676        | NS                          |
| Int pred/No horm - No pred/No horm  | 0.0523         | 0.0188        | 78        | 2.775       | 0.1398        | NS                          |

|                                         |                |               |           |              |                   |                             |
|-----------------------------------------|----------------|---------------|-----------|--------------|-------------------|-----------------------------|
| No pred/CORT - No pred/MTP              | 0.01758        | 0.0188        | 78        | 0.933        | 0.9903            | NS                          |
| No pred/CORT - No pred/No horm          | 0.01191        | 0.0188        | 78        | 0.632        | 0.9994            | NS                          |
| No pred/MTP - No pred/No horm           | -0.00567       | 0.0188        | 78        | -0.301       | 1                 | NS                          |
| Day 4                                   |                |               |           |              |                   |                             |
| Contrast                                | Estimate       | SE            | df        | t ratio      | P                 | (Bonferroni alpha = 0.0014) |
| <b>Con pred/CORT - Con pred/MTP</b>     | <b>0.0779</b>  | <b>0.0188</b> | <b>78</b> | <b>4.134</b> | <b>0.0027</b>     | <b>NS</b>                   |
| <b>Con pred/CORT - Con pred/No horm</b> | <b>0.06368</b> | <b>0.0188</b> | <b>78</b> | <b>3.379</b> | <b>0.0297</b>     | <b>NS</b>                   |
| Con pred/CORT - Int pred/CORT           | 0.03148        | 0.0188        | 78        | 1.67         | 0.7624            | NS                          |
| <b>Con pred/CORT - Int pred/MTP</b>     | <b>0.11869</b> | <b>0.0188</b> | <b>78</b> | <b>6.298</b> | <b>&lt;.0001</b>  | <b>S</b>                    |
| <b>Con pred/CORT - Int pred/No horm</b> | <b>0.08756</b> | <b>0.0188</b> | <b>78</b> | <b>4.646</b> | <b>0.0004</b>     | <b>S</b>                    |
| <b>Con pred/CORT - No pred/CORT</b>     | <b>0.06985</b> | <b>0.0188</b> | <b>78</b> | <b>3.706</b> | <b>0.0111</b>     | <b>NS</b>                   |
| <b>Con pred/CORT - No pred/MTP</b>      | <b>0.10731</b> | <b>0.0188</b> | <b>78</b> | <b>5.694</b> | <b>&lt;0.0001</b> | <b>S</b>                    |
| <b>Con pred/CORT - No pred/No horm</b>  | <b>0.1156</b>  | <b>0.0188</b> | <b>78</b> | <b>6.134</b> | <b>&lt;0.0001</b> | <b>S</b>                    |
| Con pred/MTP - Con pred/No horm         | -0.01422       | 0.0188        | 78        | -0.755       | 0.9977            | NS                          |
| Con pred/MTP - Int pred/CORT            | -0.04643       | 0.0188        | 78        | -2.463       | 0.266             | NS                          |
| Con pred/MTP - Int pred/MTP             | 0.04079        | 0.0188        | 78        | 2.164        | 0.4389            | NS                          |
| Con pred/MTP - Int pred/No horm         | 0.00966        | 0.0188        | 78        | 0.513        | 0.9999            | NS                          |
| Con pred/MTP - No pred/CORT             | -0.00806       | 0.0188        | 78        | -0.427       | 1                 | NS                          |
| Con pred/MTP - No pred/MTP              | 0.02941        | 0.0188        | 78        | 1.56         | 0.8227            | NS                          |
| Con pred/MTP - No pred/No horm          | 0.0377         | 0.0188        | 78        | 2            | 0.5478            | NS                          |
| Con pred/No horm - Int pred/CORT        | -0.03221       | 0.0188        | 78        | -1.709       | 0.7393            | NS                          |
| Con pred/No horm - Int pred/MTP         | 0.05501        | 0.0188        | 78        | 2.919        | 0.1               | NS                          |
| Con pred/No horm - Int pred/No horm     | 0.02388        | 0.0188        | 78        | 1.267        | 0.9378            | NS                          |
| Con pred/No horm - No pred/CORT         | 0.00616        | 0.0188        | 78        | 0.327        | 1                 | NS                          |
| Con pred/No horm - No pred/MTP          | 0.04363        | 0.0188        | 78        | 2.315        | 0.3462            | NS                          |
| Con pred/No horm - No pred/No horm      | 0.05192        | 0.0188        | 78        | 2.755        | 0.1462            | NS                          |
| <b>Int pred/CORT - Int pred/MTP</b>     | <b>0.08721</b> | <b>0.0188</b> | <b>78</b> | <b>4.628</b> | <b>0.0005</b>     | <b>S</b>                    |
| <b>Int pred/CORT - Int pred/No horm</b> | <b>0.05609</b> | <b>0.0188</b> | <b>78</b> | <b>2.976</b> | <b>0.087</b>      | <b>NS</b>                   |
| Int pred/CORT - No pred/CORT            | 0.03837        | 0.0188        | 78        | 2.036        | 0.5238            | NS                          |
| <b>Int pred/CORT - No pred/MTP</b>      | <b>0.07584</b> | <b>0.0188</b> | <b>78</b> | <b>4.024</b> | <b>0.004</b>      | <b>NS</b>                   |
| <b>Int pred/CORT - No pred/No horm</b>  | <b>0.08413</b> | <b>0.0188</b> | <b>78</b> | <b>4.464</b> | <b>0.0009</b>     | <b>S</b>                    |
| Int pred/MTP - Int pred/No horm         | -0.03113       | 0.0188        | 78        | -1.652       | 0.7732            | NS                          |
| Int pred/MTP - No pred/CORT             | -0.04884       | 0.0188        | 78        | -2.592       | 0.2071            | NS                          |
| Int pred/MTP - No pred/MTP              | -0.01138       | 0.0188        | 78        | -0.604       | 0.9995            | NS                          |
| Int pred/MTP - No pred/No horm          | -0.00309       | 0.0188        | 78        | -0.164       | 1                 | NS                          |
| Int pred/No horm - No pred/CORT         | -0.01772       | 0.0188        | 78        | -0.94        | 0.9898            | NS                          |

|                                            |                 |               |           |               |                   |                                       |  |
|--------------------------------------------|-----------------|---------------|-----------|---------------|-------------------|---------------------------------------|--|
| Int pred/No horm - No pred/MTP             | 0.01975         | 0.0188        | 78        | 1.048         | 0.9796            | NS                                    |  |
| Int pred/No horm - No pred/No horm         | 0.02804         | 0.0188        | 78        | 1.488         | 0.8578            | NS                                    |  |
| No pred/CORT - No pred/MTP                 | 0.03747         | 0.0188        | 78        | 1.988         | 0.5563            | NS                                    |  |
| No pred/CORT - No pred/No horm             | 0.04576         | 0.0188        | 78        | 2.428         | 0.284             | NS                                    |  |
| No pred/MTP - No pred/No horm              | 0.00829         | 0.0188        | 78        | 0.44          | 1                 | NS                                    |  |
|                                            |                 |               |           |               |                   |                                       |  |
|                                            |                 |               |           |               |                   |                                       |  |
| Day 8                                      |                 |               |           |               |                   |                                       |  |
| Contrast                                   | Estimate        | SE            | df        | t ratio       | P                 | (Bonferroni-corrected alpha = 0.0014) |  |
| <b>Con pred/CORT - Con pred/MTP</b>        | <b>0.09012</b>  | <b>0.0188</b> | <b>78</b> | <b>4.782</b>  | <b>0.0003</b>     | <b>S</b>                              |  |
| Con pred/CORT - Con pred/No horm           | -0.05799        | 0.0188        | 78        | -3.077        | 0.0674            | NS                                    |  |
| <b>Con pred/CORT - Int pred/CORT</b>       | <b>-0.07513</b> | <b>0.0188</b> | <b>78</b> | <b>-3.987</b> | <b>0.0045</b>     | <b>NS</b>                             |  |
| <b>Con pred/CORT - Int pred/MTP</b>        | <b>0.12507</b>  | <b>0.0188</b> | <b>78</b> | <b>6.636</b>  | <b>&lt;0.0001</b> | <b>S</b>                              |  |
| <b>Con pred/CORT - Int pred/No horm</b>    | <b>0.07836</b>  | <b>0.0188</b> | <b>78</b> | <b>4.158</b>  | <b>0.0025</b>     | <b>NS</b>                             |  |
| Con pred/CORT - No pred/CORT               | 0.02754         | 0.0188        | 78        | 1.461         | 0.8696            | NS                                    |  |
| <b>Con pred/CORT - No pred/MTP</b>         | <b>0.089</b>    | <b>0.0188</b> | <b>78</b> | <b>4.722</b>  | <b>0.0003</b>     | <b>S</b>                              |  |
| <b>Con pred/CORT - No pred/No horm</b>     | <b>0.09738</b>  | <b>0.0188</b> | <b>78</b> | <b>5.167</b>  | <b>0.0001</b>     | <b>S</b>                              |  |
| <b>Con pred/MTP - Con pred/No horm</b>     | <b>-0.14811</b> | <b>0.0188</b> | <b>78</b> | <b>-7.859</b> | <b>&lt;0.0001</b> | <b>S</b>                              |  |
| <b>Con pred/MTP - Int pred/CORT</b>        | <b>-0.16525</b> | <b>0.0188</b> | <b>78</b> | <b>-8.768</b> | <b>&lt;0.0001</b> | <b>S</b>                              |  |
| Con pred/MTP - Int pred/MTP                | 0.03495         | 0.0188        | 78        | 1.854         | 0.6464            | NS                                    |  |
| Con pred/MTP - Int pred/No horm            | -0.01176        | 0.0188        | 78        | -0.624        | 0.9994            | NS                                    |  |
| <b>Con pred/MTP - No pred/CORT</b>         | <b>-0.06258</b> | <b>0.0188</b> | <b>78</b> | <b>-3.32</b>  | <b>0.035</b>      | <b>NS</b>                             |  |
| Con pred/MTP - No pred/MTP                 | -0.00112        | 0.0188        | 78        | -0.059        | 1                 | NS                                    |  |
| Con pred/MTP - No pred/No horm             | 0.00726         | 0.0188        | 78        | 0.385         | 1                 | NS                                    |  |
| Con pred/No horm - Int pred/CORT           | -0.01714        | 0.0188        | 78        | -0.91         | 0.9918            | NS                                    |  |
| <b>Con pred/No horm - Int pred/MTP</b>     | <b>0.18306</b>  | <b>0.0188</b> | <b>78</b> | <b>9.713</b>  | <b>&lt;0.0001</b> | <b>S</b>                              |  |
| <b>Con pred/No horm - Int pred/No horm</b> | <b>0.13635</b>  | <b>0.0188</b> | <b>78</b> | <b>7.235</b>  | <b>&lt;0.0001</b> | <b>S</b>                              |  |
| <b>Con pred/No horm - No pred/CORT</b>     | <b>0.08553</b>  | <b>0.0188</b> | <b>78</b> | <b>4.538</b>  | <b>0.0007</b>     | <b>S</b>                              |  |
| <b>Con pred/No horm - No pred/MTP</b>      | <b>0.14699</b>  | <b>0.0188</b> | <b>78</b> | <b>7.799</b>  | <b>&lt;0.0001</b> | <b>S</b>                              |  |
| <b>Con pred/No horm - No pred/No horm</b>  | <b>0.15537</b>  | <b>0.0188</b> | <b>78</b> | <b>8.244</b>  | <b>&lt;0.0001</b> | <b>S</b>                              |  |
| <b>Int pred/CORT - Int pred/MTP</b>        | <b>0.2002</b>   | <b>0.0188</b> | <b>78</b> | <b>10.623</b> | <b>&lt;0.0001</b> | <b>S</b>                              |  |
| <b>Int pred/CORT - Int pred/No horm</b>    | <b>0.1535</b>   | <b>0.0188</b> | <b>78</b> | <b>8.145</b>  | <b>&lt;0.0001</b> | <b>S</b>                              |  |
| <b>Int pred/CORT - No pred/CORT</b>        | <b>0.10267</b>  | <b>0.0188</b> | <b>78</b> | <b>5.448</b>  | <b>&lt;0.0001</b> | <b>S</b>                              |  |
| <b>Int pred/CORT - No pred/MTP</b>         | <b>0.16413</b>  | <b>0.0188</b> | <b>78</b> | <b>8.709</b>  | <b>&lt;0.0001</b> | <b>S</b>                              |  |
| <b>Int pred/CORT - No pred/No horm</b>     | <b>0.17251</b>  | <b>0.0188</b> | <b>78</b> | <b>9.154</b>  | <b>&lt;0.0001</b> | <b>S</b>                              |  |
| Int pred/MTP - Int pred/No horm            | -0.0467         | 0.0188        | 78        | -2.478        | 0.2588            | NS                                    |  |
| <b>Int pred/MTP - No pred/CORT</b>         | <b>-0.09753</b> | <b>0.0188</b> | <b>78</b> | <b>-5.175</b> | <b>0.0001</b>     | <b>S</b>                              |  |
| Int pred/MTP - No pred/MTP                 | -0.03607        | 0.0188        | 78        | -1.914        | 0.6066            | NS                                    |  |

|                                       |                |               |           |              |               |           |  |
|---------------------------------------|----------------|---------------|-----------|--------------|---------------|-----------|--|
| Int pred/MTP - No pred/No horm        | -0.02769       | 0.0188        | 78        | -1.469       | 0.8662        | NS        |  |
| Int pred/No horm - No pred/CORT       | -0.05082       | 0.0188        | 78        | -2.697       | 0.1661        | NS        |  |
| Int pred/No horm - No pred/MTP        | 0.01064        | 0.0188        | 78        | 0.564        | 0.9997        | NS        |  |
| Int pred/No horm - No pred/No horm    | 0.01902        | 0.0188        | 78        | 1.009        | 0.9839        | NS        |  |
| <b>No pred/CORT - No pred/MTP</b>     | <b>0.06146</b> | <b>0.0188</b> | <b>78</b> | <b>3.261</b> | <b>0.0413</b> | <b>NS</b> |  |
| <b>No pred/CORT - No pred/No horm</b> | <b>0.06984</b> | <b>0.0188</b> | <b>78</b> | <b>3.706</b> | <b>0.0112</b> | <b>NS</b> |  |
| No pred/MTP - No pred/No horm         | 0.00838        | 0.0188        | 78        | 0.445        | 1             | NS        |  |

| Supplementary Table S2. Pairwise contrasts for activity level among treatments during each day of observation.                                                                      |               |             |           |               |                   |                                      |
|-------------------------------------------------------------------------------------------------------------------------------------------------------------------------------------|---------------|-------------|-----------|---------------|-------------------|--------------------------------------|
| Rows with an uncorrected P value < 0.05 are marked in bold. The rightside column indicates significance under the Bonferroni-corrected alpha (S: significant, NS: non-significant). |               |             |           |               |                   |                                      |
| Day 0                                                                                                                                                                               |               |             |           |               |                   |                                      |
| Contrast                                                                                                                                                                            | Estimate      | SE          | df        | t ratio       | P                 | (Bonferroni-corrected alpha = 0.003) |
| Con pred/CORT - Con pred/MTP                                                                                                                                                        | -0.935        | 1.66        | 54        | -0.562        | 0.993             | NS                                   |
| Con pred/CORT - Con Pred/No horm                                                                                                                                                    | -3.517        | 1.66        | 54        | -2.113        | 0.2963            | NS                                   |
| Con pred/CORT - No pred/CORT                                                                                                                                                        | -2.07         | 1.66        | 54        | -1.243        | 0.8136            | NS                                   |
| Con pred/CORT - No pred/MTP                                                                                                                                                         | -4.215        | 1.66        | 54        | -2.532        | 0.1329            | NS                                   |
| Con pred/CORT - No pred/No horm                                                                                                                                                     | 0.179         | 1.66        | 54        | 0.108         | 1                 | NS                                   |
| Con pred/MTP - Con Pred/No horm                                                                                                                                                     | -2.582        | 1.66        | 54        | -1.551        | 0.6336            | NS                                   |
| Con pred/MTP - No pred/CORT                                                                                                                                                         | -1.134        | 1.66        | 54        | -0.681        | 0.9833            | NS                                   |
| Con pred/MTP - No pred/MTP                                                                                                                                                          | -3.28         | 1.66        | 54        | -1.97         | 0.3724            | NS                                   |
| Con pred/MTP - No pred/No horm                                                                                                                                                      | 1.115         | 1.66        | 54        | 0.67          | 0.9846            | NS                                   |
| Con Pred/No horm - No pred/CORT                                                                                                                                                     | 1.448         | 1.66        | 54        | 0.87          | 0.9521            | NS                                   |
| Con Pred/No horm - No pred/MTP                                                                                                                                                      | -0.699        | 1.66        | 54        | -0.42         | 0.9982            | NS                                   |
| Con Pred/No horm - No pred/No horm                                                                                                                                                  | 3.696         | 1.66        | 54        | 2.22          | 0.2456            | NS                                   |
| No pred/CORT - No pred/MTP                                                                                                                                                          | -2.146        | 1.66        | 54        | -1.289        | 0.7896            | NS                                   |
| No pred/CORT - No pred/No horm                                                                                                                                                      | 2.248         | 1.66        | 54        | 1.351         | 0.7555            | NS                                   |
| No pred/MTP - No pred/No horm                                                                                                                                                       | 4.394         | 1.66        | 54        | 2.64          | 0.1051            | NS                                   |
| Day 4                                                                                                                                                                               |               |             |           |               |                   |                                      |
| Contrast                                                                                                                                                                            | Estimate      | SE          | df        | t ratio       | P                 | (Bonferroni-corrected alpha = 0.003) |
| <b>Con pred/CORT - Con pred/MTP</b>                                                                                                                                                 | <b>-5.274</b> | <b>1.66</b> | <b>54</b> | <b>-3.168</b> | <b>0.0288</b>     | <b>S</b>                             |
| Con pred/CORT - Con Pred/No horm                                                                                                                                                    | -0.128        | 1.66        | 54        | -0.077        | 1                 | NS                                   |
| <b>Con pred/CORT - No pred/CORT</b>                                                                                                                                                 | <b>-9.019</b> | <b>1.66</b> | <b>54</b> | <b>-5.418</b> | <b>&lt;0.0001</b> | <b>S</b>                             |
| <b>Con pred/CORT - No pred/MTP</b>                                                                                                                                                  | <b>-9.643</b> | <b>1.66</b> | <b>54</b> | <b>-5.793</b> | <b>&lt;0.0001</b> | <b>S</b>                             |
| <b>Con pred/CORT - No pred/No horm</b>                                                                                                                                              | <b>-7.719</b> | <b>1.66</b> | <b>54</b> | <b>-4.637</b> | <b>0.0003</b>     | <b>S</b>                             |
| <b>Con pred/MTP - Con Pred/No horm</b>                                                                                                                                              | <b>5.146</b>  | <b>1.66</b> | <b>54</b> | <b>3.092</b>  | <b>0.0352</b>     | <b>NS</b>                            |
| Con pred/MTP - No pred/CORT                                                                                                                                                         | -3.745        | 1.66        | 54        | -2.25         | 0.2328            | NS                                   |
| Con pred/MTP - No pred/MTP                                                                                                                                                          | -4.37         | 1.66        | 54        | -2.625        | 0.1087            | NS                                   |
| Con pred/MTP - No pred/No horm                                                                                                                                                      | -2.445        | 1.66        | 54        | -1.469        | 0.6851            | NS                                   |
| <b>Con Pred/No horm - No pred/CORT</b>                                                                                                                                              | <b>-8.892</b> | <b>1.66</b> | <b>54</b> | <b>-5.342</b> | <b>&lt;0.0001</b> | <b>S</b>                             |
| <b>Con Pred/No horm - No pred/MTP</b>                                                                                                                                               | <b>-9.516</b> | <b>1.66</b> | <b>54</b> | <b>-5.717</b> | <b>&lt;0.0001</b> | <b>S</b>                             |
| <b>Con Pred/No horm - No pred/No horm</b>                                                                                                                                           | <b>-7.591</b> | <b>1.66</b> | <b>54</b> | <b>-4.561</b> | <b>0.0004</b>     | <b>S</b>                             |
| No pred/CORT - No pred/MTP                                                                                                                                                          | -0.625        | 1.66        | 54        | -0.375        | 0.999             | NS                                   |
| No pred/CORT - No pred/No horm                                                                                                                                                      | 1.3           | 1.66        | 54        | 0.781         | 0.9696            | NS                                   |
| No pred/MTP - No pred/No horm                                                                                                                                                       | 1.925         | 1.66        | 54        | 1.156         | 0.8553            | NS                                   |

| Day 8                                     |               |             |           |               |               |                                      |
|-------------------------------------------|---------------|-------------|-----------|---------------|---------------|--------------------------------------|
| Contrast                                  | Estimate      | SE          | df        | t ratio       | P             | (Bonferroni-corrected alpha = 0.003) |
| Con pred/CORT - Con pred/MTP              | 0.989         | 1.66        | 54        | 0.594         | 0.991         | NS                                   |
| Con pred/CORT - Con Pred/No horm          | 1.755         | 1.66        | 54        | 1.054         | 0.897         | NS                                   |
| Con pred/CORT - No pred/CORT              | -4.357        | 1.66        | 54        | -2.618        | 0.1105        | NS                                   |
| Con pred/CORT - No pred/MTP               | -4.261        | 1.66        | 54        | -2.56         | 0.1253        | NS                                   |
| <b>Con pred/CORT - No pred/No horm</b>    | <b>-5.589</b> | <b>1.66</b> | <b>54</b> | <b>-3.358</b> | <b>0.0172</b> | <b>NS</b>                            |
| Con pred/MTP - Con Pred/No horm           | 0.766         | 1.66        | 54        | 0.46          | 0.9973        | NS                                   |
| <b>Con pred/MTP - No pred/CORT</b>        | <b>-5.346</b> | <b>1.66</b> | <b>54</b> | <b>-3.212</b> | <b>0.0257</b> | <b>NS</b>                            |
| <b>Con pred/MTP - No pred/MTP</b>         | <b>-5.25</b>  | <b>1.66</b> | <b>54</b> | <b>-3.154</b> | <b>0.0299</b> | <b>NS</b>                            |
| <b>Con pred/MTP - No pred/No horm</b>     | <b>-6.579</b> | <b>1.66</b> | <b>54</b> | <b>-3.952</b> | <b>0.003</b>  | <b>S</b>                             |
| <b>Con Pred/No horm - No pred/CORT</b>    | <b>-6.112</b> | <b>1.66</b> | <b>54</b> | <b>-3.672</b> | <b>0.007</b>  | <b>NS</b>                            |
| <b>Con Pred/No horm - No pred/MTP</b>     | <b>-6.016</b> | <b>1.66</b> | <b>54</b> | <b>-3.614</b> | <b>0.0082</b> | <b>NS</b>                            |
| <b>Con Pred/No horm - No pred/No horm</b> | <b>-7.345</b> | <b>1.66</b> | <b>54</b> | <b>-4.412</b> | <b>0.0007</b> | <b>S</b>                             |
| No pred/CORT - No pred/MTP                | 0.096         | 1.66        | 54        | 0.058         | 1             | NS                                   |
| No pred/CORT - No pred/No horm            | -1.232        | 1.66        | 54        | -0.74         | 0.9759        | NS                                   |
| No pred/MTP - No pred/No horm             | -1.328        | 1.66        | 54        | -0.798        | 0.9667        | NS                                   |

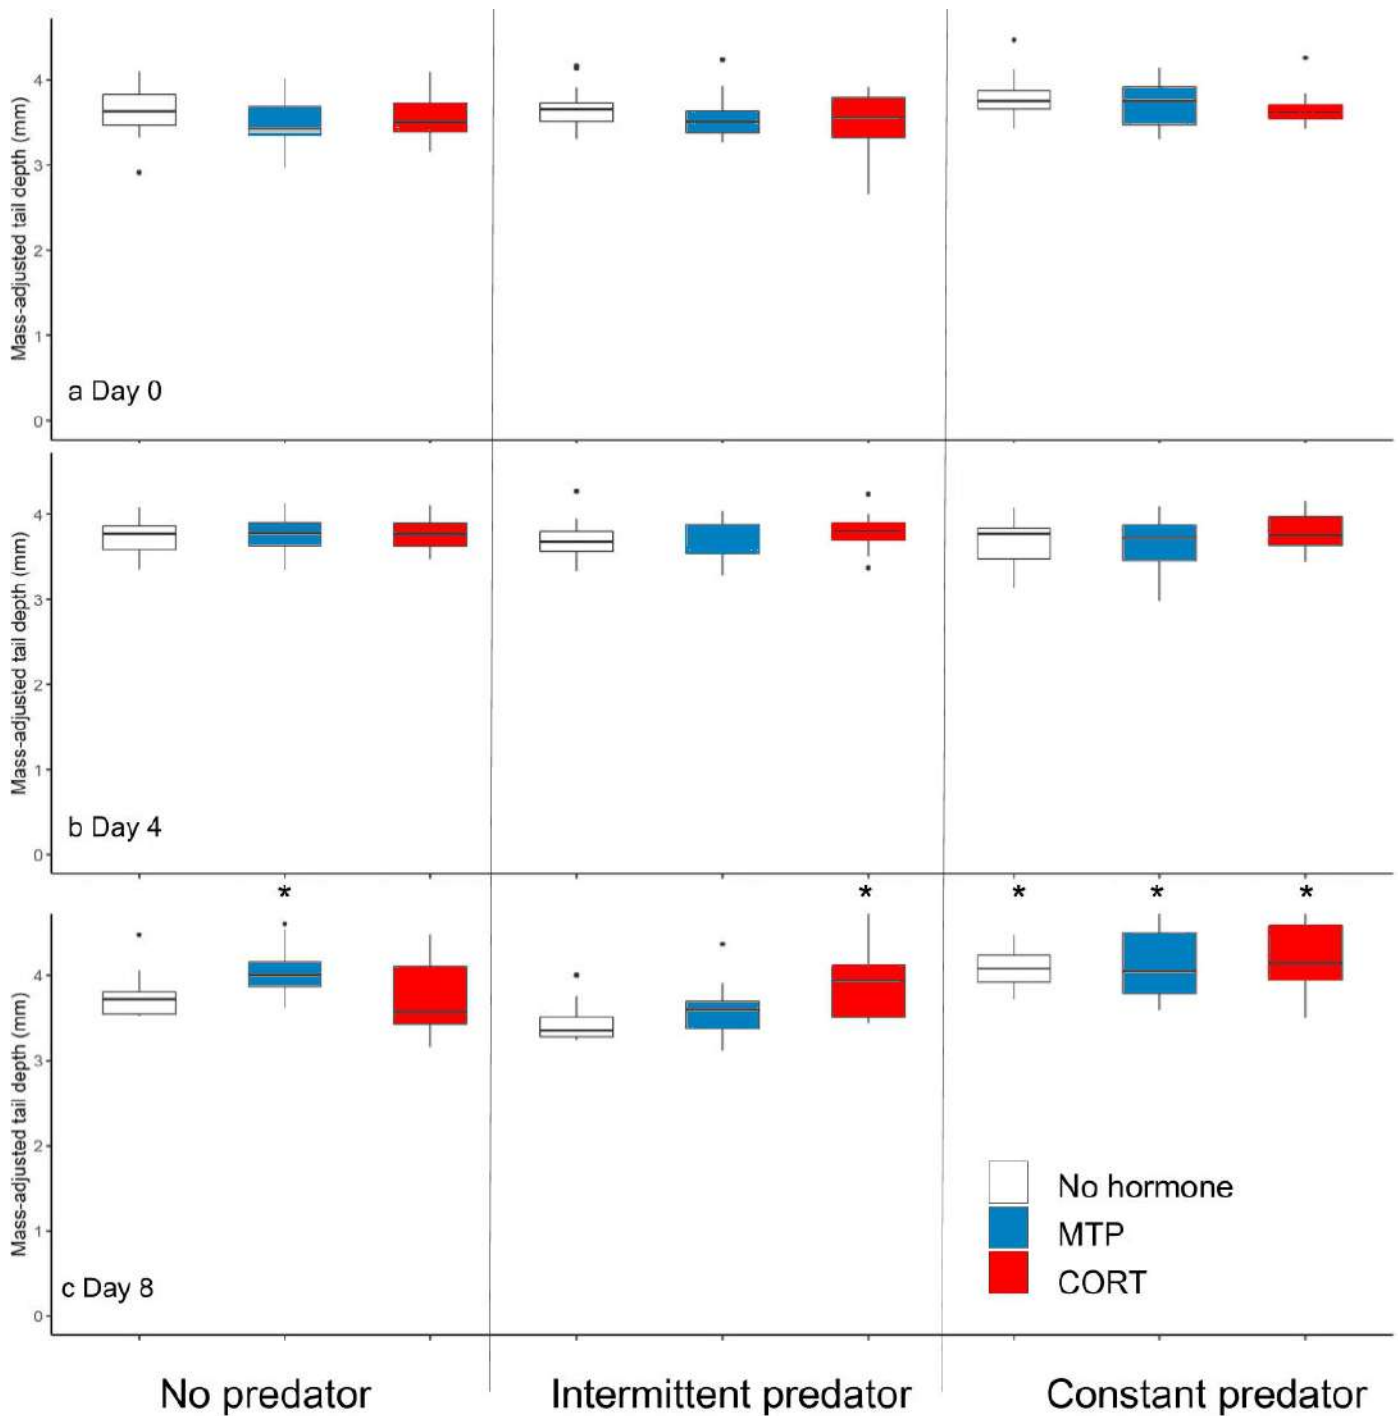

**Supplementary Figure S1.** Boxplots (median and interquartile range) of mass-adjusted tail depth of wood frog tadpoles in each treatment combination ( $n = 4$  replicates) on Day 0 (a), Day 4 (b), and Day 8 (c). Asterisks indicate statistically significant differences compared to the No predator/No hormone treatment ( $P < 0.05$ ).
